# Supplementary material for: Unravelling the interplay of sphingolipids and TGF-β signaling in the human corneal stroma
Source: PLOS journal article supplement (doi:10.1371/journal.pone.0182390), 2017-08-14

### S1P stimulation

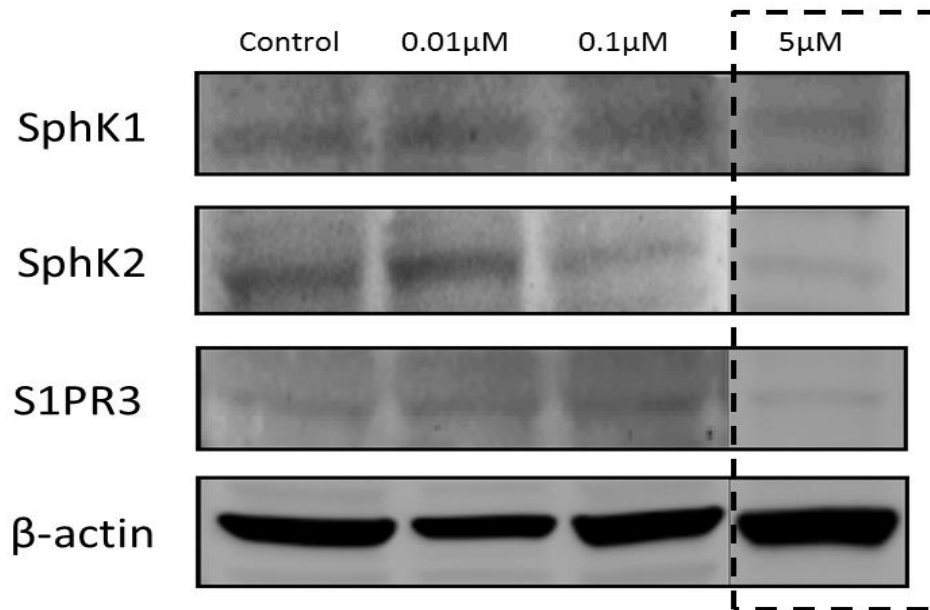

### SPHK I<sub>2</sub> stimulation

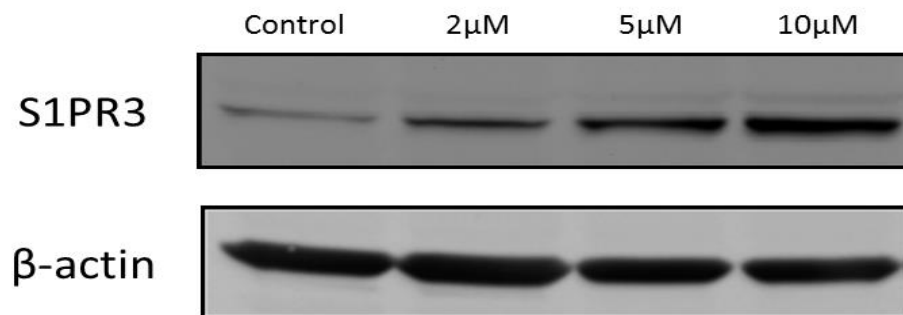

Supplement: S1 (10.1371/journal.pone.0182390.s001) [file journal.pone.0182390.s001]
